# Supplementary material
Source: publisher figshare collection journal article supplement (https://acs.figshare.com/ndownloader/files/17784938)
Supplement: Supplementary file 1 [file 17784938]

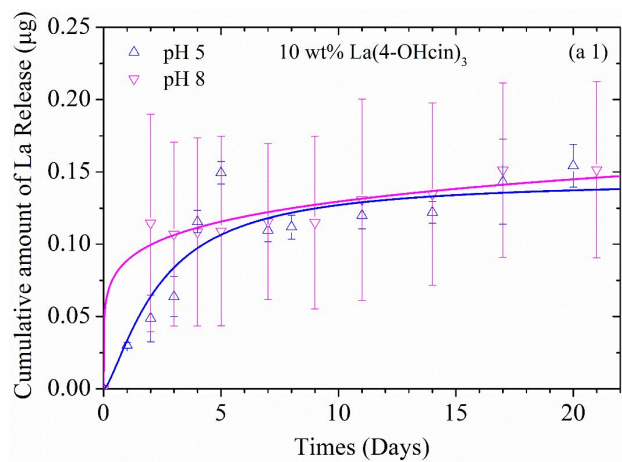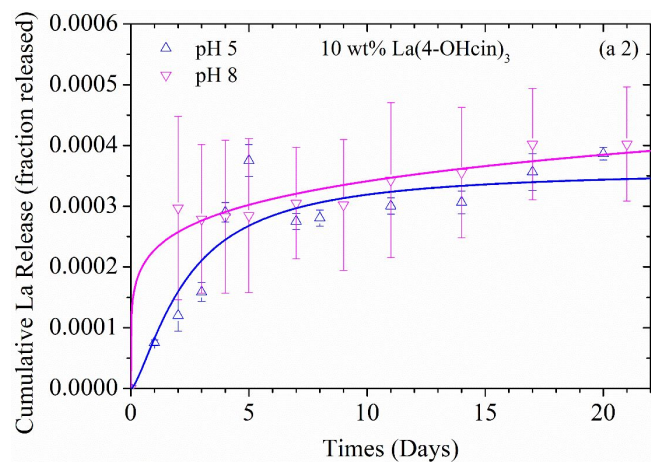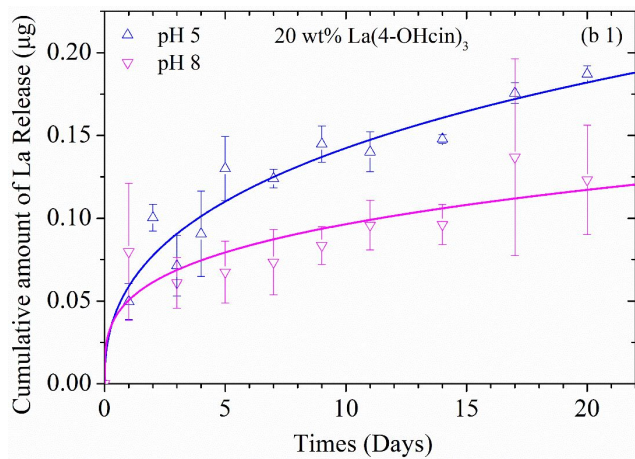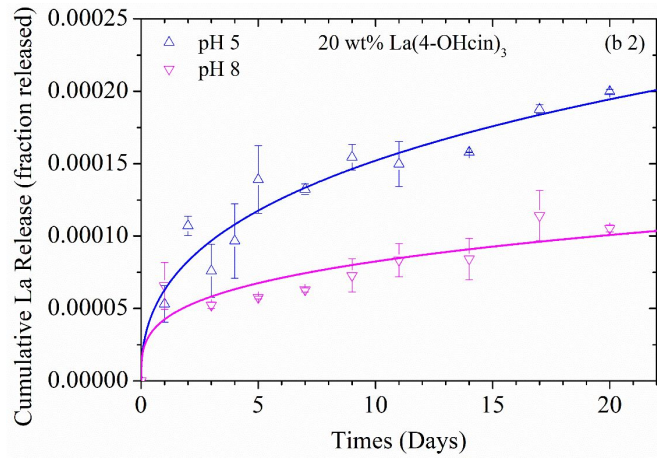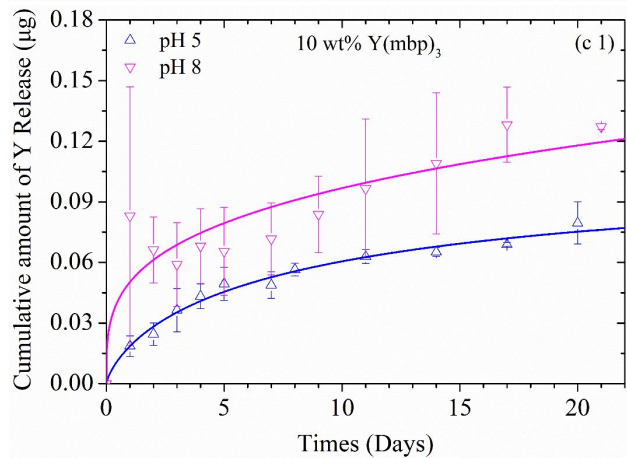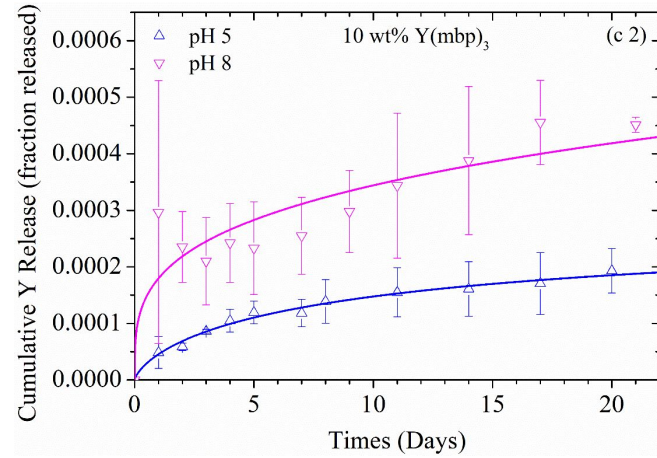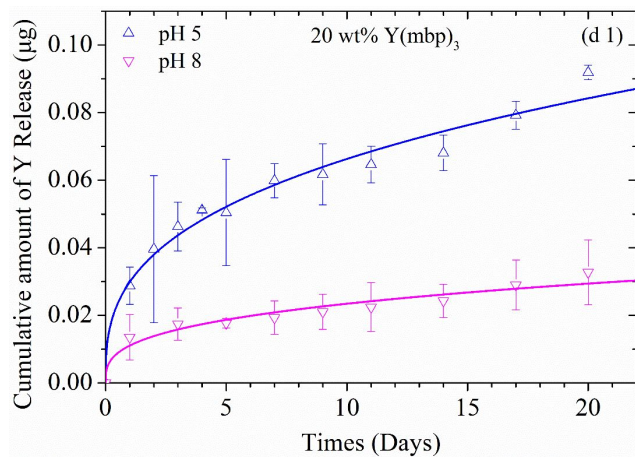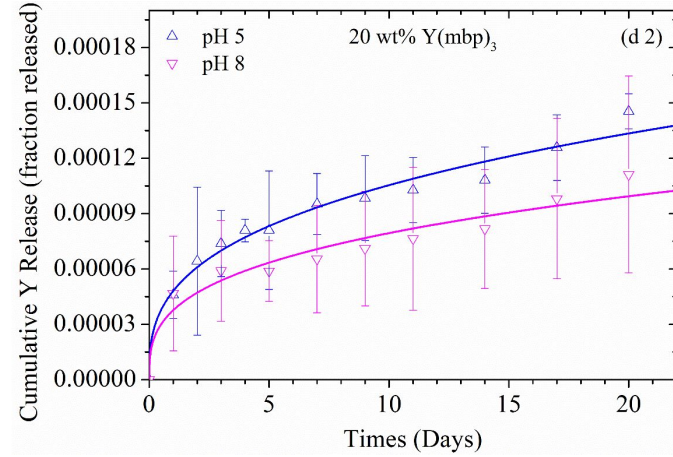

Figure S1. Cumulative released amount by mass and fraction of RE (La or Y) as a function of time at pH 5 and 8 conditions for different inhibitor loaded free films containing 10 wt% La(4-OHcin)<sub>3</sub> ((a1) and (a2)); 20 wt% La(4-OHcin)<sub>3</sub> ((b1) and (b2)); 10 wt% Y(mbp)<sub>3</sub> ((c1) and (c2)); 20 wt% Y(mbp)<sub>3</sub> ((d1) and (d2)).

Figure S1 amplifies the leaching profiles for different inhibitor loaded coatings at pH 5 and 8 conditions (shown at the bottom of each graph in Figure 3), representing the extremely low level of RE leaching at these pHs.
